# Supplementary material
Source: PubMed Central journal article supplement (PMC2738573)
Supplement: blood-2009-03-209510_1.pdf [file blood-2009-03-209510_1.pdf]

| <b>Genotype</b> | <b>n</b> | <b>Mean</b> | <b>Std Dev</b> | <b>Median</b> | <b>Min</b> | <b>Max</b> |
|-----------------|----------|-------------|----------------|---------------|------------|------------|
| <b>aa</b>       | 70       | 6.98        | 2.45           | 6.7           | 2.2        | 12.8       |
| <b>ab</b>       | 51       | 7.14        | 2.99           | 6.7           | 2.2        | 14.4       |
| <b>bb</b>       | 11       | 7.38        | 3.06           | 8.3           | 3.3        | 12.2       |
