# Supplementary material
Source: PubMed Central journal article supplement (PMC2738573)
Supplement: blood-2009-03-209510_2.pdf [file blood-2009-03-209510_2.pdf]

| <b>Stable Dami cell line</b> | <b>No. of clones</b> | <b>GMFI* (mean <math>\pm</math> SD)</b> |
|------------------------------|----------------------|-----------------------------------------|
| Mock transfected             | 3                    | 3.2 $\pm$ 0.5                           |
| rGPVIa                       | 3                    | 21.9 $\pm$ 4.0                          |
| rGPVIb                       | 3                    | 23.5 $\pm$ 4.5                          |

\*Geometric Mean Fluorescence Intensity; MAb HY101
